# Supplementary material for: lncRNA SNHG10 Promotes the Proliferation and Invasion of Osteosarcoma via Wnt/β-Catenin Signaling
Source: PubMed Central journal article supplement — Mol Ther Nucleic Acids. 2020 Oct 15;22:957–70. doi: 10.1016/j.omtn.2020.10.010 (PMC7674123; doi:10.1016/j.omtn.2020.10.010), 2020-10-15
Supplement: mmc1.pdf [file mmc1.pdf]

**OMTN, Volume 22**

**Supplemental Information**

**lncRNA SNHG10 Promotes the Proliferation  
and Invasion of Osteosarcoma  
via Wnt/ $\beta$ -Catenin Signaling**

**Shutao Zhu, Yang Liu, Xiao Wang, Junyi Wang, and Guanghui Xi**

# LncRNA SNHG10 promotes the proliferation and invasion of osteosarcoma via Wnt/ $\beta$ -catenin signaling

Shutao Zhu<sup>1\*</sup>, Yang Liu<sup>1\*#</sup>, Xiao Wang<sup>1</sup>, Junyi Wang<sup>1</sup>, Guanghui Xi<sup>1</sup>

<sup>1</sup>Department of orthopedics, Huaihe Hospital, the First Affiliated Hospital of Henan University, China.

\* The first two authors contributed equally to this work.

# Correspondence: Yang Liu, Department of orthopedics, Huaihe Hospital, the First Affiliated Hospital of Henan University, China, E-mail address: hhyly163@163.com

## Supplementary figures

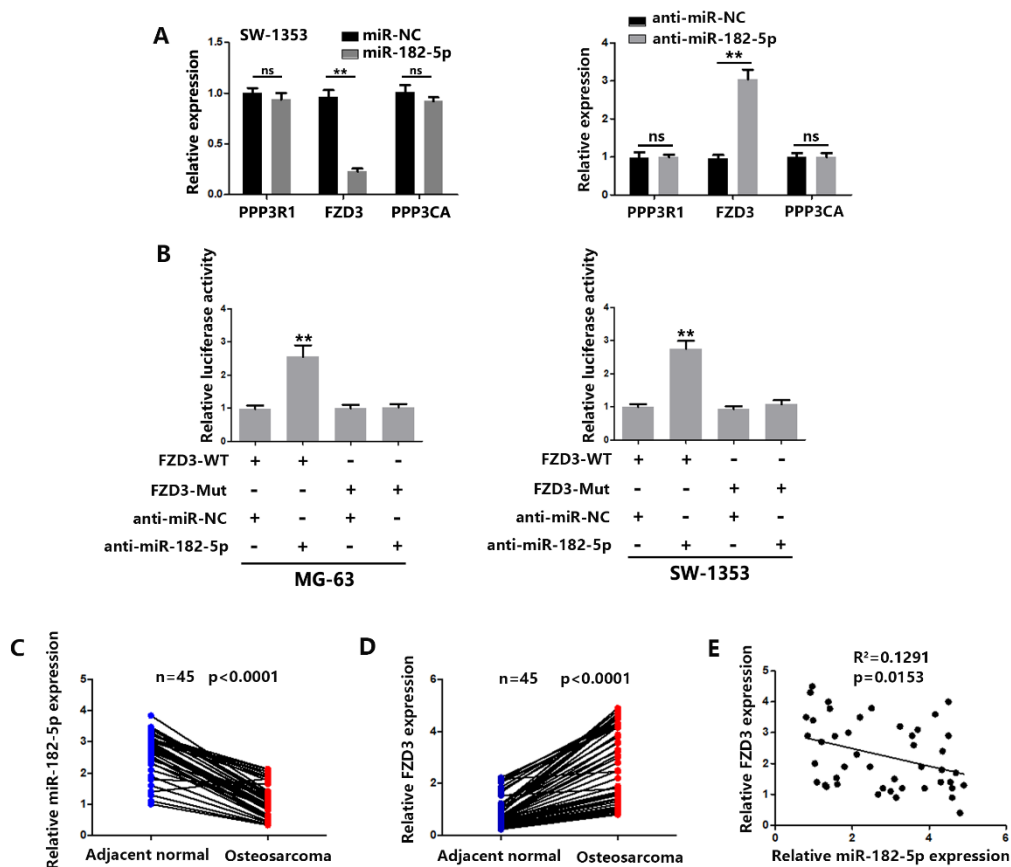

**Figure S1 FZD3 is a target of miR-182-5p, Related to Figure 5**

(A) mRNA expression of PPP3R1, FZD3 and PPP3CA in OS cells transfected with

miR-182-5p mimic or anti-miR-182-5p.

(B) Relative FZD3 reporter activities in OS cells co-transfected with anti-miR-182-5p and luciferase reporters.

(C) Relative expression of miR-182-5p in OS and adjacent normal samples were quantified by qRT-PCR.

(D) Relative expression of FZD3 in OS and adjacent normal samples were quantified by qRT-PCR.

(E) Spearman correlation analysis of the FZD3 and miR-182-5p expression levels in OS samples.

In all experiments, bars represent mean  $\pm$  SD from three independent experiments.

(\*P < .05, \*\*P < .01.)

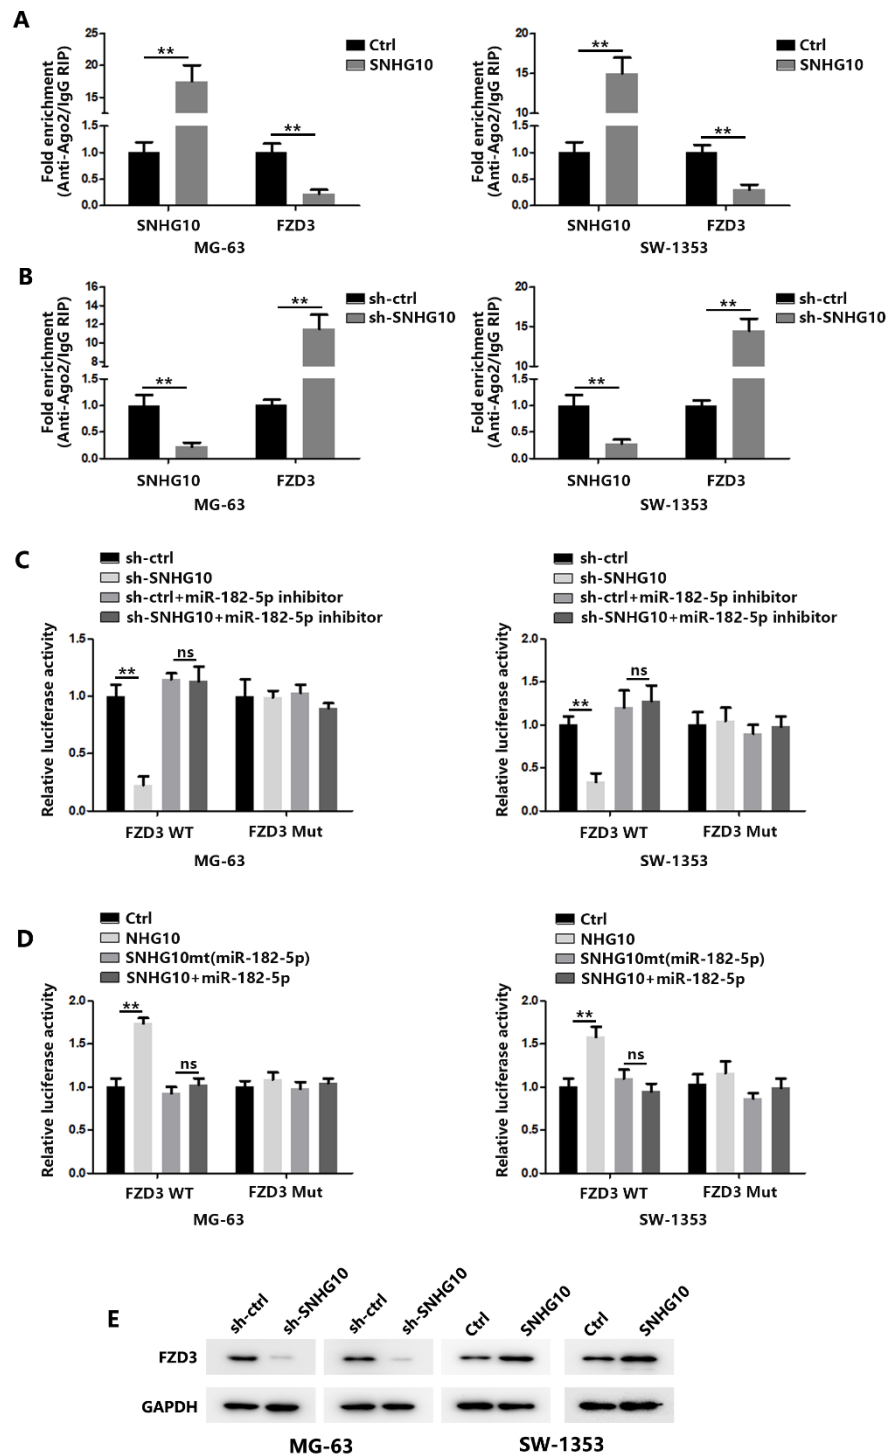

**Figure S2 SNHG10 promotes OS progression through FZD3, Related to Figure 6**

(A) RIP assay of the enrichment of Ago2 on SNHG10 and FZD3 transcripts relative to IgG in OS cells transfected with SNHG10 or control.

(B) RIP assay of the enrichment of Ago2 on SNHG10 and FZD3 transcripts relative to IgG in OS cells transfected with sh-SNHG10 or sh-control.

(C) Luciferase activity of reporters which contained wild-type or mt FZD3 3'UTR with indicated treatment in OS cells.

In all experiments, bars represent mean  $\pm$  SD from three independent experiments.

(\*P < .05, \*\*P < .01.)

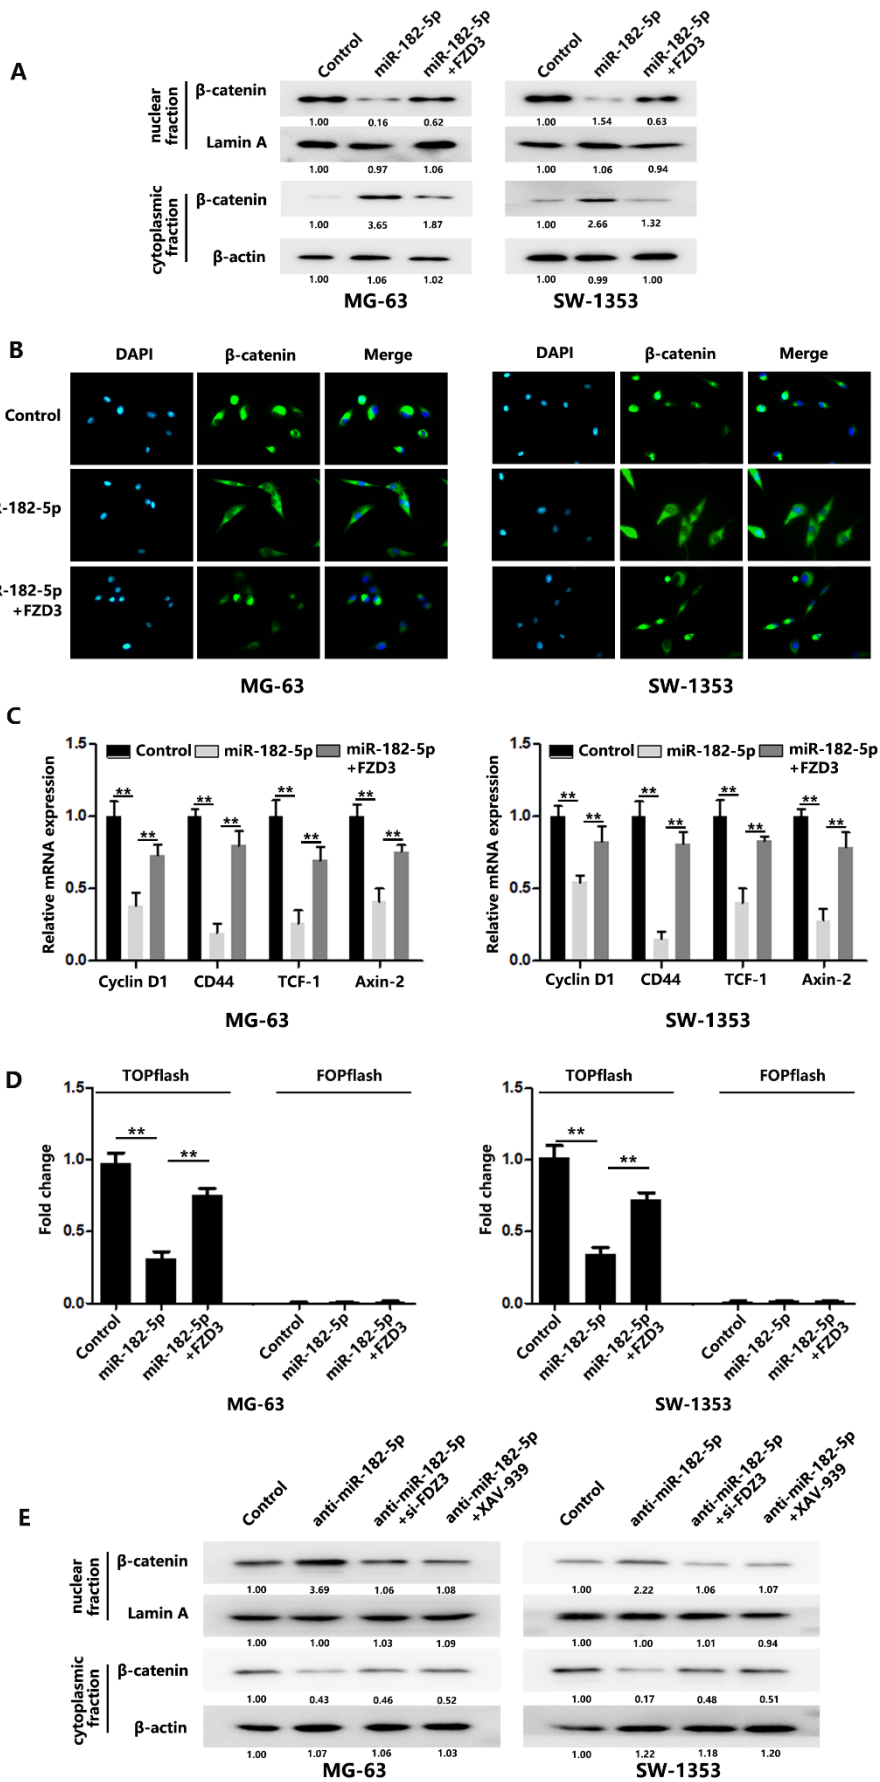

**Figure S3 SNHG10 activates Wnt/ $\beta$ -catenin pathway to promote OS progression,  
Related to Figure 7**

(A)  $\beta$ -catenin protein redistribution in different cellular compartments of transfected OS cells was quantified using western blot.

(B)  $\beta$ -catenin protein redistribution in different cellular compartments of transfected OS cells was quantified using immunofluorescence staining. Scale bar, 100  $\mu$ m.

(C) Relative expression levels of Wnt/ $\beta$ -catenin pathway downstream target genes were quantified using RT-PCR.

(D) Relative TCF/LEF reporter activity was measured after transfection with miR-182-5p or co-transfection with FZD3.

(E)  $\beta$ -catenin protein redistribution in different cellular compartments of transfected or XAV-939 treated OS cells was quantified using western blot.

In all experiments, bars represent mean  $\pm$  SD from three independent experiments.

(\*P < .05, \*\*P < .01.)

Supplementary Material and Methods

Primers used in this study

|        | Forward                | Reverse               |
|--------|------------------------|-----------------------|
| SNHG10 | CCAGCTTAGATTCATTGATTCC | TTAAGTGCACCAGATGCTG   |
| FZD3   | GGATTGTTCTCGGGATTTC    | AGTGTGACACGTCCATATTCC |
| U6     | CTCGCTTCGGCAGCACA      | AACGCTTCACGAATTTGCGT  |
| GAPDH  | GAACGGGAAGCTCACTGG     | GCCTGCTTCACCACCTTCT   |

Antibodies used in this study

| Name           | Company                   | Catalog  |
|----------------|---------------------------|----------|
| Cyclin D1      | Cell Signaling Technology | 55506    |
| Cyclin E1      | Cell Signaling Technology | 20808    |
| N-cadherin     | Cell Signaling Technology | 13116    |
| E-cadherin     | Cell Signaling Technology | 14472    |
| Vimentin       | Cell Signaling Technology | 5741     |
| FZD3           | Abcam                     | ab217032 |
| GAPDH          | Cell Signaling Technology | 5174     |
| $\beta$ -actin | Cell Signaling Technology | 3700     |
